# Supplementary material for: Reduction of inappropriate medication in older populations by electronic decision support (the PRIMA-eDS study): a qualitative study of practical implementation in primary care
Source: Springer Nature journal article supplement (doi:10.1186/s12875-018-0789-3), 2018-07-09
Supplement: MOESM1 [file 15927766]

| Main category                          | Sub category                                                                          |
|----------------------------------------|---------------------------------------------------------------------------------------|
| Adoption of the intervention: the eCRF | Usage<br>Entering data into the eCRF<br>Effort<br>Technical problems                  |
| Adoption of the intervention: the CMR  | Usage<br>Experiences with the patient<br>Expenditure of time<br>Evaluation of the CMR |
| Adoption of the recommendations        | Medication changes<br>Barriers<br>Other effects resulting from the CMR                |
| Future implementation                  | Future utilization<br>Enhancing factors<br>Hindering factors                          |
